# Supplementary material for: An intergenic non-coding RNA promoter required for histone modifications in the human β-globin chromatin domain
Source: PubMed Central journal article supplement (PMC6693763; doi:10.1371/journal.pone.0217532), 2019-08-14

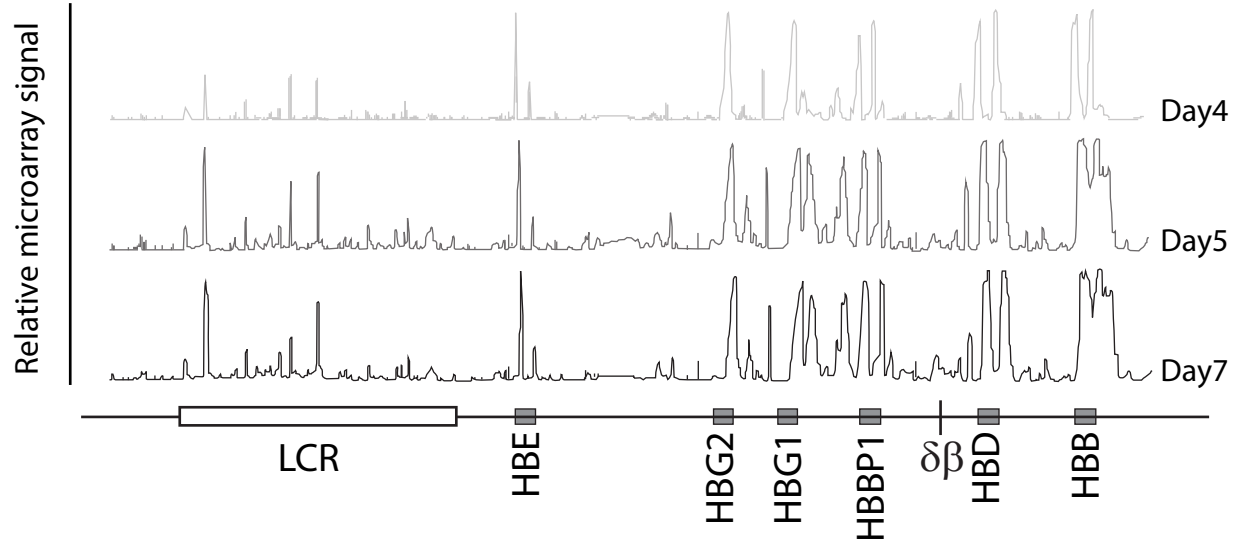

Supplement: pone.0217532.s001.pdf [file pone.0217532.s001.pdf]
